# Supplementary material for: Lactylation stabilizes DCBLD1 activating the pentose phosphate pathway to promote cervical cancer progression
Source: PubMed Central journal article supplement (PMC10829273; doi:10.1186/s13046-024-02943-x), 2024-01-31

# Supplementary Figure 1

S1A

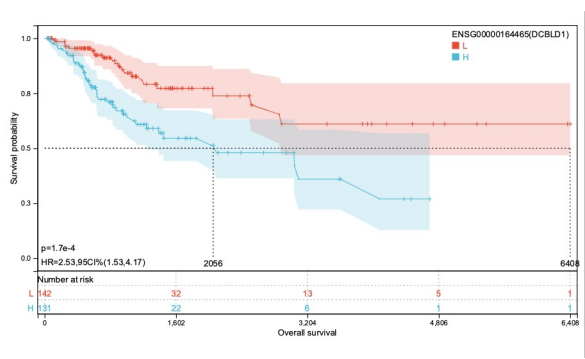

S1B

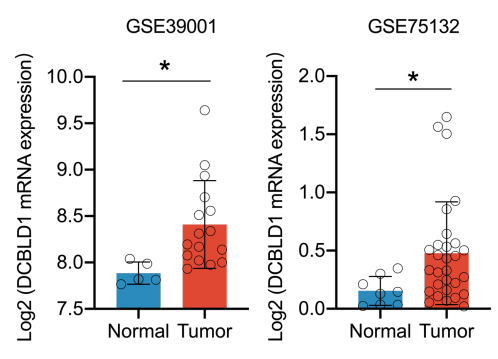

S1C

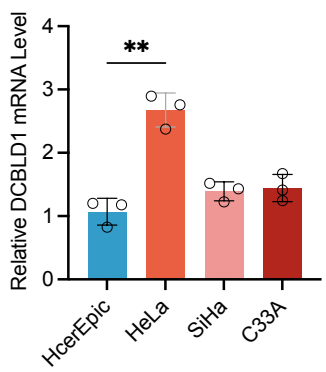

S1D

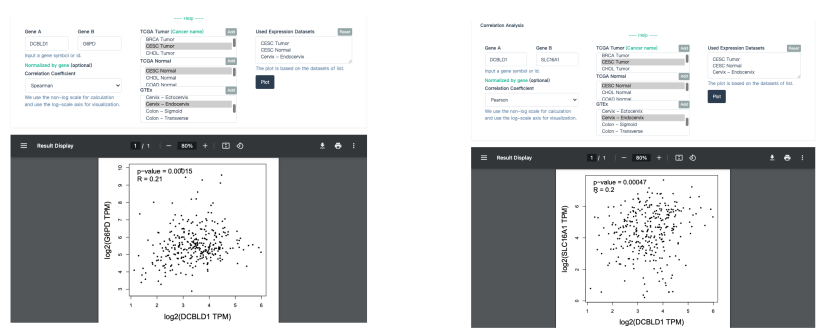

**Supplementary Figure 2**

**S2A**

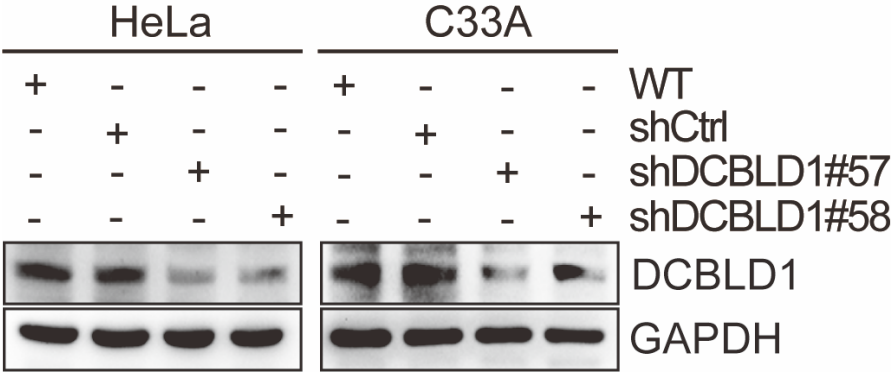

**S2B**

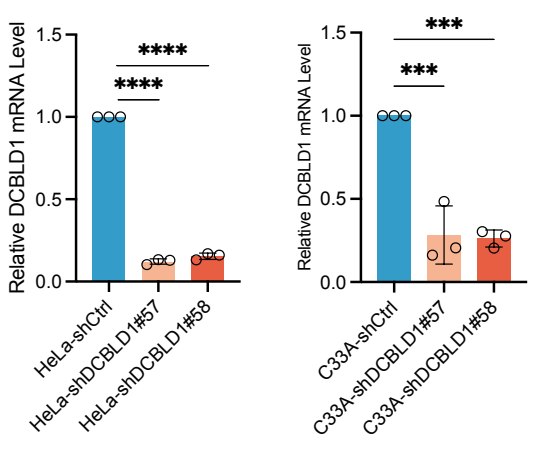

**S2C**

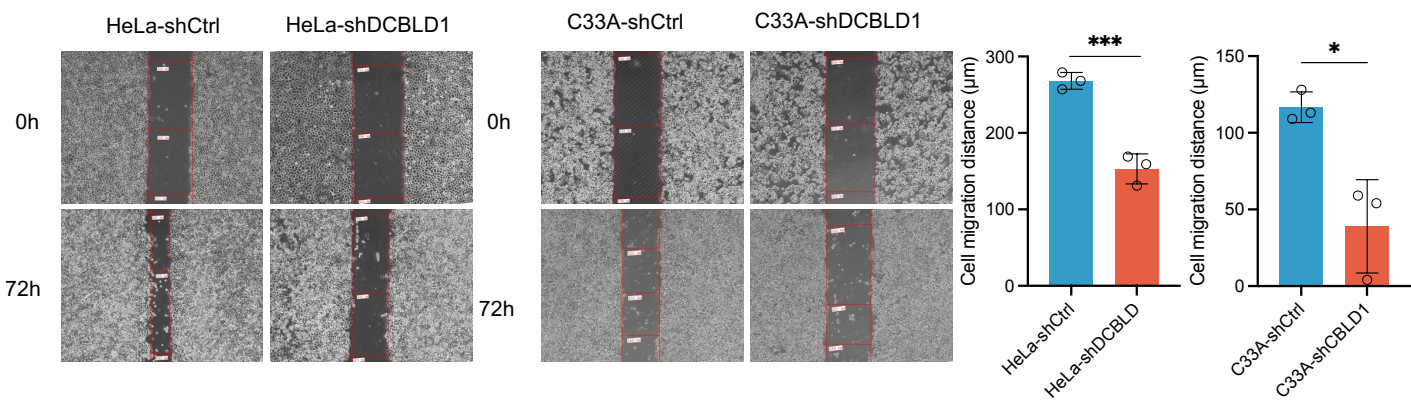

Supplement: 13046_2024_2943_MOESM1_ESM.pdf [file 13046_2024_2943_MOESM1_ESM.pdf]
